# Supplementary material for: The effect of the particle size on Fischer–Tropsch synthesis for ZSM-5 zeolite supported cobalt-based catalysts
Source: Royal Society of Chemistry journal article supplement (doi:10.1039/d1cc04844a), 2021-01-01
Supplement: d1cc04844a1.pdf [file d1cc04844a1.pdf]

## Electronic Supplementary Information

# The effect of the particle size on Fischer–Tropsch synthesis for ZSM-5 zeolite supported cobalt-based catalysts

Hao Wang<sup>a</sup>, Ziwei Wang<sup>a</sup>, Sheng Wang<sup>a</sup>, Chengguang Yang<sup>a</sup>, Shenggang Li<sup>a,b,c</sup>, Peng Gao<sup>\*a,b</sup>, and Yuhan Sun<sup>a,c</sup>

<sup>a</sup>CAS Key Laboratory of Low-Carbon Conversion Science and Engineering, Shanghai Advanced Research Institute, Chinese Academy of Sciences, Shanghai 201210, PR China.

<sup>b</sup>University of Chinese Academy of Sciences, Beijing 100049, PR China.

<sup>c</sup>School of Physical Science and Technology, ShanghaiTech University, Shanghai 201210, PR China

\*Corresponding author. Tel: +86–021–20350994, Fax: +86–021–20608066.

E-mail: gaopeng@sari.ac.cn (P. Gao)

## Experimental Details

### Catalyst preparation

*Synthesis of mesoporous ZSM-5 (Z5) zeolite:* Pristine ZSM-5 zeolites were hydrothermally synthesized using n-butylamine and ethylamine as templates according to the literature.<sup>1</sup> Pristine H-ZSM-5 was prepared by mixing 8.0 g of as-synthesized ZSM-5 and 80 g of 0.2 M NaOH solution at 70 °C for 1 h. After being stirred for 1 h, resultant solids were collected by filtration, washing, and drying. This treatment process was repeated once. The H-form of the sample was obtained by ion-exchanging with a 1.0 M NH<sub>4</sub>Cl solution at 70 °C for 1 h (1.0 g of zeolite in 10 mL of solution), and

the ion-exchange process was performed three times followed by calcination at 550 °C for 4 h. Z5 was prepared by treating H-ZSM-5 zeolite using 0.5 M TPAOH solutions. In a typical synthesis, 5.0 g of H-ZSM-5 and the calculated CTAB were mixed with 50 mL of 0.5 M TPAOH solution by using a sealed Teflon-lined stainless-steel autoclave. After hydrothermal treatment at 170 °C for 24 h, Z5 was obtained by filtrating, washing with deionized water, drying at 110 °C overnight, and calcining at 550 °C for 4 h.

*Synthesis of Co-x/Z5 catalysts:* Co-x/Z5 catalysts were prepared by an incipient wetness impregnation method. For Co-4.5/Z5, Co-9.9/Z5 and Co-14/Z5 catalysts, cobalt nitrate hexahydrate ( $\text{Co}(\text{NO}_3)_2 \cdot 6\text{H}_2\text{O}$ ) were dissolved into deionized water, the cobalt loading was 4.6, 17.8 and 19.2 wt.%, respectively. Then the precursor solution was impregnated on Z5 support and mixed for about 20 min. Next, the mixture was frozen at  $-80$  °C for 20 h and then transferred to a freeze dryer for 48 h. After that, the Co-4.5/Z5 and Co-9.9/Z5 samples were calcined in 10% NO/Ar at 250 °C for 5 h while the Co-14/Z5 samples were calcined in 10% NO/Ar at 450 °C for 5 h. For Co-18/Z5 catalyst, cobalt nitrate hexahydrate ( $\text{Co}(\text{NO}_3)_2 \cdot 6\text{H}_2\text{O}$ ) was first dissolved into deionized water. Then the precursor solution was impregnated on Z5 support with cobalt loading of 18.1 wt.% and mixed for about 20 min. Next, the mixture was aged at 80 °C for 20 h in an oven. After that, the sample was calcined in  $\text{N}_2$  at 250 °C for 5 h.

### **Catalyst characterization**

Powder X-ray diffraction (XRD) pattern was performed on a Rigaku Ultima IV X-ray powder diffractometer using  $\text{Cu K}\alpha$  ( $\lambda = 1.54056 \text{ \AA}$ ) radiation, scanning from  $5^\circ$  to  $90^\circ$  with a scanning rate of  $4^\circ \text{ min}^{-1}$ . The average size of the  $\text{Co}_3\text{O}_4$  crystallite ( $d(\text{Co}_3\text{O}_4)$ ) was calculated by the Scherrer's

equation from the  $\text{Co}_3\text{O}_4$  peak at  $2\theta = 36.9^\circ$ . And the average Co size was calculated from the corresponding  $d(\text{Co}_3\text{O}_4)$  by applying the molar volume correction:  $d(\text{Co}^0) = 0.75d(\text{Co}_3\text{O}_4)$ .

The specific surface area, pore volume, and pore size were determined by  $\text{N}_2$  adsorption–desorption measurements using Micromeritics ASAP 2420 instrument. All  $\text{Co-}x/\text{Z5}$  catalysts were degassed at  $300^\circ\text{C}$  for 12 h before analysis. The specific surface area was calculated using the Brunauer–Emmett–Teller (BET) method and the pore volume was determined at a relative pressure ( $P/P_0$ ) of 0.99.

Scanning electron microscopy (SEM) images were obtained by a Zeiss Supra 55 instrument with an accelerating voltage of 2.0 kV. Transmission electron microscopy (TEM) images were taken on a JEOL-JEM 2000FX electron microscope with an accelerating voltage of 200 kV. Pyridine-adsorption Fourier transform infrared (FT–IR) experiment was carried out with a Fourier transform infrared spectrometer equipped with Nicolet Nexus 4700.

Temperature programmed desorption of  $\text{NH}_3$  ( $\text{NH}_3$ –TPD) was performed on a Micromeritics 2920 chemisorption system. The sample was pre-treated with an Ar flow at  $400^\circ\text{C}$  for 1 h and then cooled down to  $100^\circ\text{C}$ . Next, the sample was exposed to  $\text{NH}_3$  for 1 h and purged with Ar to remove the physically adsorbed  $\text{NH}_3$ . Finally, the signal was recorded from  $100^\circ\text{C}$  to  $600^\circ\text{C}$  at a rate of  $5^\circ\text{C min}^{-1}$ .

Temperature programmed desorption of CO ( $\text{CO}$ –TPD) was performed on a Micromeritics 2920 chemisorption system. The sample was first reduced by a  $\text{H}_2$  flow at  $400^\circ\text{C}$  for 8 h and evacuated in Ar flow for 1 h. Next, the temperature was cooled down to  $50^\circ\text{C}$  for CO adsorption. The sample was purged by Ar flow and then heated from  $50^\circ\text{C}$  to  $800^\circ\text{C}$  at a rate of  $10^\circ\text{C min}^{-1}$ .

H<sub>2</sub> temperature programmed reduction (H<sub>2</sub>-TPR) was carried out with a Micromeritics 2920 chemisorption system. The sample was heated under Ar flow at 150 °C for 2 h and then cooled down to 50 °C. Then 5% H<sub>2</sub>/Ar mixture was introduced and the temperature was raised to 800 °C at a rate of 5 °C min<sup>-1</sup>.

X-ray photoelectron spectroscopy (XPS) measurements were studied on a Kratos AXIS ULTRA DLD spectrometer equipped with Al K $\alpha$  radiation (150 W,  $h\nu = 1486.6$  eV) under ultrahigh vacuum (10<sup>-7</sup> bar). Adventitious carbon deposit C (1s) with E<sub>b</sub> = 284.8 eV was deemed as reference to calibrate internally the binding energies of other elements.

Co dispersion was evaluated on a Micromeritics 2920 chemisorption system. The as-prepared sample was first reduced with a H<sub>2</sub> flow at 400 °C for 8 h and then evacuated in an Ar flow for 1 h. Then the temperature was cooled down to 100 °C for the adsorption of H<sub>2</sub> for 1 h. The sample was purged by Ar flow and then heated from 100 °C to 400 °C at a rate of 10 °C min<sup>-1</sup>. The dispersion was calculated according to the equation  $D = 1.179X/Wf$ , where  $X$  was the total H<sub>2</sub> uptake in micromoles per gram of catalyst,  $W$  was the weight percentage of cobalt and  $f$  was the cobalt reduction degree calculated from O<sub>2</sub> pulse. The O<sub>2</sub> pulse was injected into the sample after reduction until the peak area detected by a thermal conductivity detector (TCD) did not change. By assuming spherical metal particles with an atom density of 14.6 atom nm<sup>-2</sup>, the particle size of metal cobalt can be calculated by: Co particle size = 0.96/dispersion.

### **Catalytic reaction**

The FTS was performed on a fixed-bed steel reactor. Prior to the catalytic test, the calcined catalyst was ground and sieved to 60–80 meshes. Then 1.0 g of Co- $x$ /Z5 catalyst was diluted with

silica sand and the volume ratio of catalyst and silica sand was 1:2. Before reaction, the catalyst was reduced in a pure H<sub>2</sub> flow (50 mL min<sup>-1</sup>) at 400 °C for 8 h. After reduction, the temperature was cooled down to 200 °C and the syngas (CO/H<sub>2</sub> = 1/2) was introduced. The catalytic tests were performed at 240 °C, 2.0 MPa, and space velocities of 3000 mL g<sub>cat</sub><sup>-1</sup> h<sup>-1</sup>. The oil and wax products of FTS were collected through cold trap (0 °C) and hot trap (120 °C), respectively, and analyzed by a flame ionization detector (FID) from Shimadzu GC2010. The tail gas passing through two traps including H<sub>2</sub>, CO, N<sub>2</sub>, CO<sub>2</sub>, and C<sub>1</sub>–C<sub>5</sub> hydrocarbons was analyzed by TCD and FID from Shimadzu GC2010. CO conversion was calculated by the internal standard method through the 1.5% N<sub>2</sub> from the feed gas. The hydrocarbon product distribution was calculated based on a molar carbon basis. All the tests keep the carbon balance in 95%–103%.

## Supplementary tables and figures

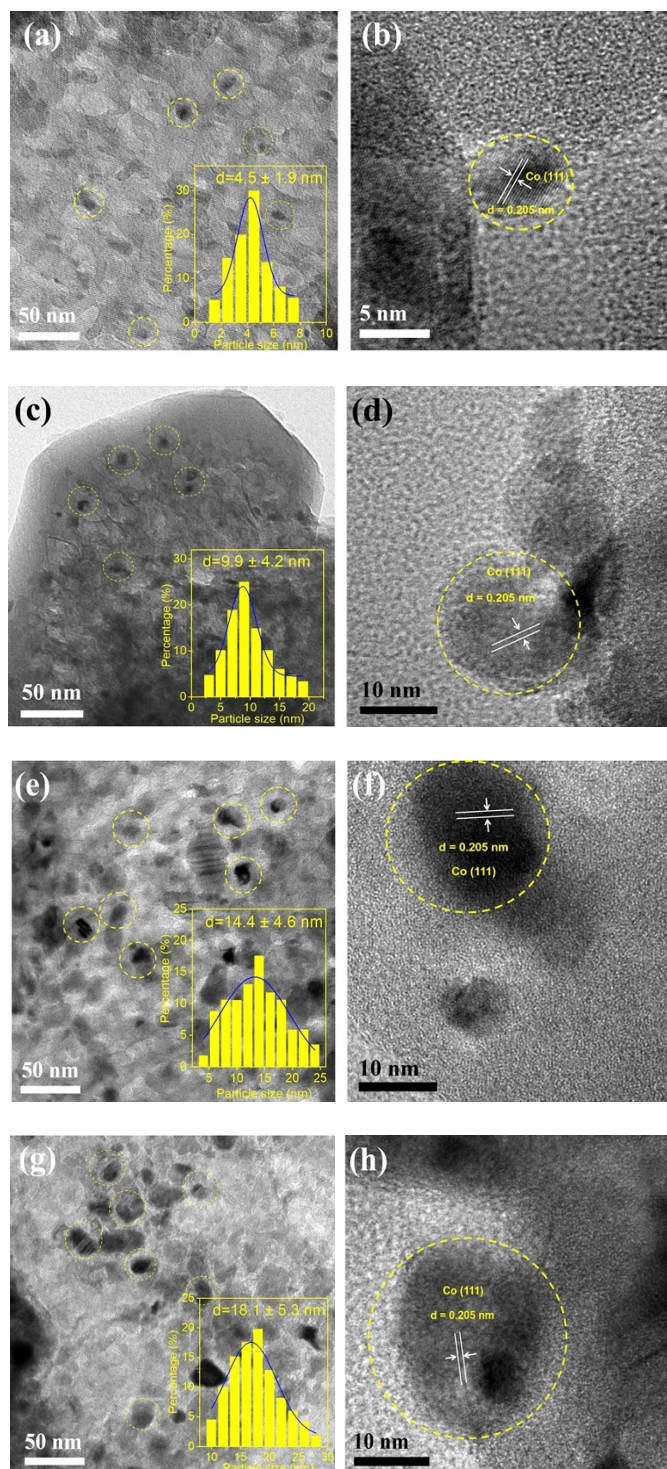

**Fig. S1** (a,c,e,g) TEM and (b,d,f,h) HRTEM images of reduced (a,b) Co-4.5/Z5, (c,d) Co-9.9/Z5, (e,f) Co-14/Z5 and (g,h) Co-18/Z5 catalysts and the inset in TEM images is the corresponding cobalt particle size distribution.

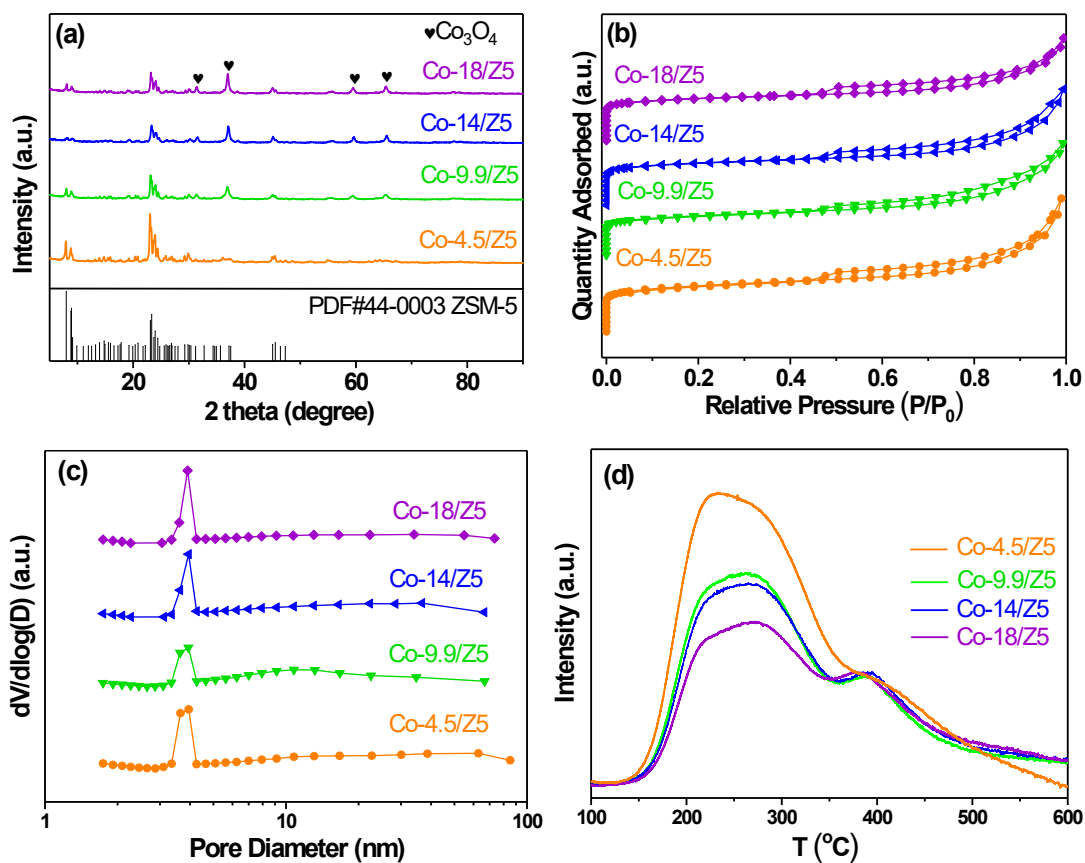

**Fig. S2** (a) XRD patterns, (b) N<sub>2</sub> adsorption–desorption curves, (c) the pore distribution and (d) NH<sub>3</sub>–TPD of Co-*x*/Z5 catalysts.

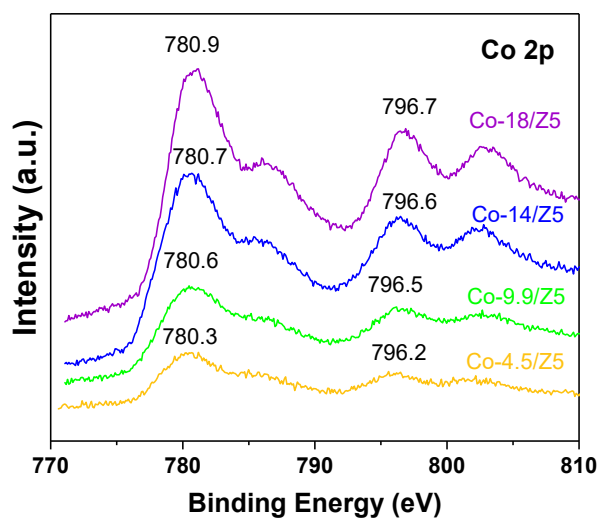

**Fig. S3** The Co 2p XPS spectra of Co-*x*/Z5 catalysts.

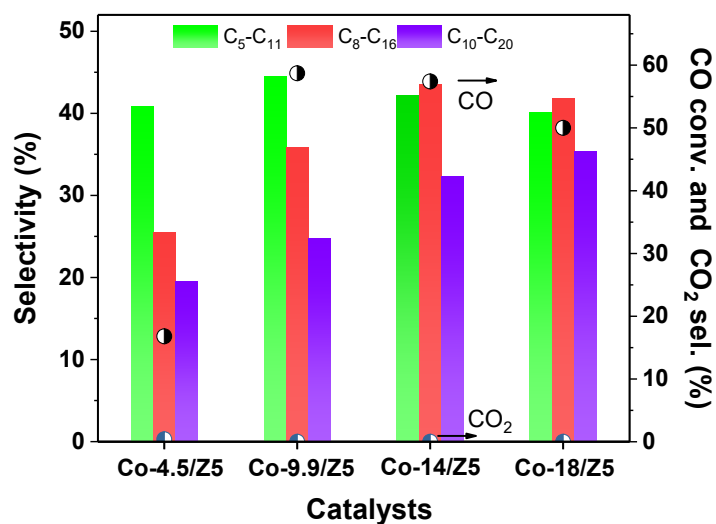

**Fig. S4** The Fischer-Tropsch performance over Co-*x*/Z5 catalysts. Reaction conditions: T = 240 °C, P = 2.0 MPa, H<sub>2</sub>/CO = 2, WHSV = 3000 mL g<sub>cat</sub><sup>-1</sup> h<sup>-1</sup> and time-on-stream of 48 h.

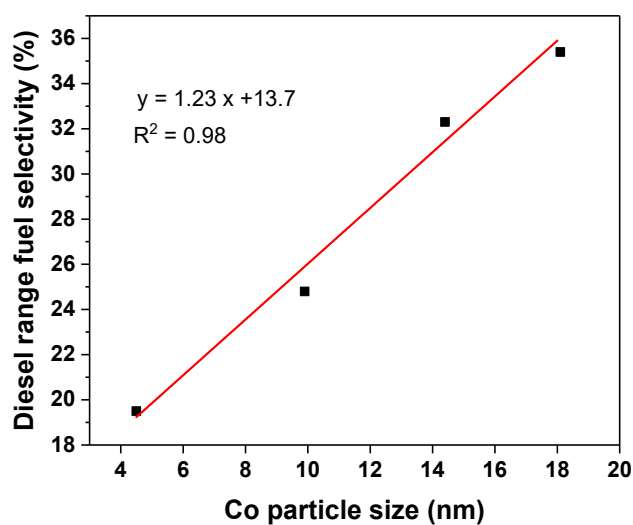

**Fig. S5** The relationship between the diesel range fuel (C<sub>10</sub>-C<sub>20</sub> hydrocarbons) selectivity and the Co particle size.



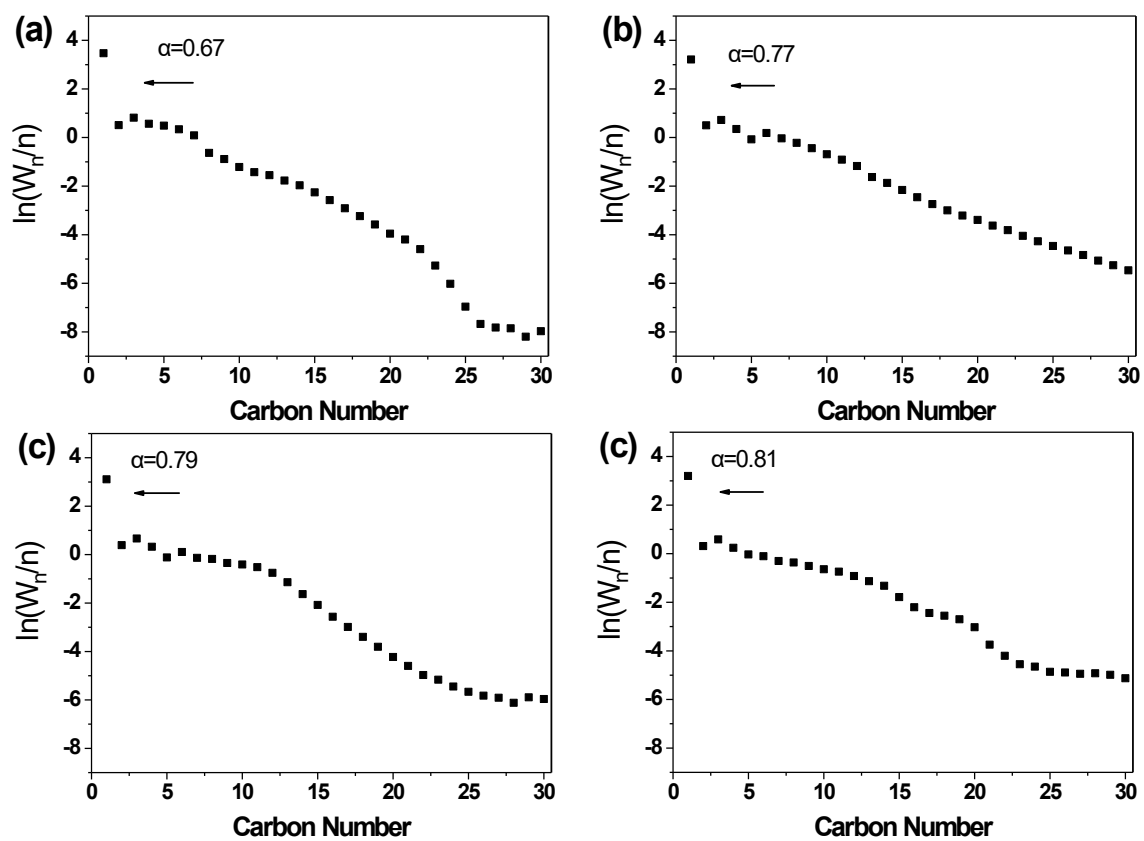

**Fig. S6** The ASF distribution and  $\alpha$  value of (a) Co-4.5/Z5, (b) Co-9.9/Z5, (c) Co-14/Z5 and (d) Co-18/Z5 catalysts.

**Table S1** Physicochemical properties of the Co-*x*/Z5 catalysts.

| Catalysts | $S_{\text{BET}}^{\text{a}}$       | $V_{\text{pore}}^{\text{a}}$       | $V_{\text{meso}}^{\text{a}}$       | $V_{\text{micro}}^{\text{a}}$      | $d_{\text{pore}}^{\text{a}}$ | $d_{\text{Co}}^{\text{b}}$ | $d_{\text{Co}}^{\text{c}}$ | $d_{\text{Co}}^{\text{d}}$ | Reducibility <sup>d</sup> | Co dispersion <sup>d</sup> |
|-----------|-----------------------------------|------------------------------------|------------------------------------|------------------------------------|------------------------------|----------------------------|----------------------------|----------------------------|---------------------------|----------------------------|
|           | (m <sup>2</sup> g <sup>-1</sup> ) | (cm <sup>3</sup> g <sup>-1</sup> ) | (cm <sup>3</sup> g <sup>-1</sup> ) | (cm <sup>3</sup> g <sup>-1</sup> ) | (nm)                         | (nm)                       | (nm)                       | (nm)                       |                           |                            |
| Co-4.5/Z5 | 312                               | 0.36                               | 0.29                               | 0.07                               | 4.7                          | -                          | 4.5                        | 4.8                        | 55.2                      | 19.8                       |
| Co-9.9/Z5 | 273                               | 0.30                               | 0.24                               | 0.06                               | 4.6                          | 10.2                       | 9.9                        | 10.4                       | 92.0                      | 9.2                        |
| Co-14/Z5  | 295                               | 0.30                               | 0.24                               | 0.06                               | 4.4                          | 14.7                       | 14.4                       | 14.7                       | 88.6                      | 6.5                        |
| Co-18/Z5  | 297                               | 0.28                               | 0.21                               | 0.07                               | 4.2                          | 18.4                       | 18.1                       | 18.5                       | 91.3                      | 5.2                        |

<sup>a</sup> Determined by N<sub>2</sub> adsorption. <sup>b</sup> Calculated by the Scherrer formula based on XRD and the formula as follow:  $d_{\text{Co}} = 0.75 d_{\text{Co}_3\text{O}_4}$ . <sup>c</sup> Calculated by the TEM. <sup>d</sup> Calculated from H<sub>2</sub>-TPD and O<sub>2</sub> titration.

**Table S2** The acidity and the H<sub>2</sub> uptake of Co-*x*/Z5 catalysts.

| Catalysts | Acidity (μmol g <sup>-1</sup> ) <sup>a</sup> |                | H <sub>2</sub> uptake<br>(μmol g <sup>-1</sup> ) <sup>b</sup> |
|-----------|----------------------------------------------|----------------|---------------------------------------------------------------|
|           | C <sub>B</sub>                               | C <sub>L</sub> |                                                               |
| Co-4.5/Z5 | 141.5                                        | 443.7          | 22.6                                                          |
| Co-9.9/Z5 | 112.6                                        | 372.1          | 124.9                                                         |
| Co-14/Z5  | 88.6                                         | 336.5          | 80.2                                                          |
| Co-18/Z5  | 80.1                                         | 316.9          | 77.9                                                          |

<sup>a</sup> Determined by Py-FTIR. <sup>b</sup> Calculated from H<sub>2</sub>-TPD.

**Table S3** The catalytic activity and selectivity of the Co-*x*/Z5 catalysts.

| Catalyst  | CO           | CO <sub>2</sub> | Hydrocarbon Selectivity (%) |                                |                                |                                 |                                 |                                  |                  |                  | $\alpha$ |
|-----------|--------------|-----------------|-----------------------------|--------------------------------|--------------------------------|---------------------------------|---------------------------------|----------------------------------|------------------|------------------|----------|
|           | Conv.<br>(%) | Sel.<br>(%)     | CH <sub>4</sub>             | C <sub>2</sub> -C <sub>4</sub> | C <sub>5</sub> -C <sub>7</sub> | C <sub>8</sub> -C <sub>16</sub> | C <sub>5</sub> -C <sub>11</sub> | C <sub>10</sub> -C <sub>20</sub> | C <sub>17+</sub> | C <sub>21+</sub> |          |
| Co-4.5/Z5 | 16.8         | 0.4             | 28.3                        | 15.2                           | 26.8                           | 25.5                            | 41.8                            | 19.5                             | 4.2              | 1.4              | 0.67     |
| Co-9.9/Z5 | 58.7         | -               | 21.9                        | 13.4                           | 19.9                           | 35.8                            | 44.5                            | 24.8                             | 9.0              | 2.0              | 0.77     |
| Co-14/Z5  | 57.4         | -               | 20.9                        | 13.4                           | 17.9                           | 43.5                            | 42.2                            | 32.3                             | 4.3              | 4.3              | 0.79     |
| Co-18/Z5  | 50.0         | -               | 21.0                        | 11.4                           | 17.0                           | 41.8                            | 40.1                            | 35.4                             | 8.8              | 3.5              | 0.81     |

Reaction conditions: T = 240 °C, P = 2.0 MPa, H<sub>2</sub>/CO = 2, WHSV = 3000 mL g<sub>cat</sub><sup>-1</sup> h<sup>-1</sup> and time-on-stream of 48 h.

## Reference

1. C. Yang, M. Qiu, S. Hu, X. Chen, G Zeng, Z. Liu and Y Sun, *Micropor. Mesopor. Mat.* **2016**, 231, 110–116.
